# Supplementary material
Source: PubMed Central journal article supplement (PMC7926290)
Supplement: jama-e210669-s002.pdf [file jama-e210669-s002.pdf]

## Supplemental Online Content

Brown PA, Ji L, Xu X, Devidas M, Hogan LE, Borowitz MJ, Raetz EA, Zugmaier G, Sharon E, Bernhardt MB, Terezakis SA, Gore L, Whitlock JA, Pulsipher MA, Hunger SP, Loh ML. Effect of Post-reinduction Therapy Consolidation With Blinatumomab vs Chemotherapy on Disease-Free Survival in Children, Adolescents, and Young Adults With First Relapse of B-Cell Acute Lymphoblastic Leukemia. *JAMA*. Published online March 2, 2021. doi:10.1001/jama.2021.0669

**Supplement 2.** eTable 1. Reinduction treatment  
eTable 2. Randomized treatment, blinatumomab group  
eTable 3. Randomized treatment, chemotherapy group  
eTable 4. Non-randomized treatment, early treatment failure group  
eTable 5. MRD transitions  
eTable 6. CD19 expression for blinatumomab patients with recurrent MRD  
eTable 7. Adverse event summary (cumulative for cycle 1 and cycle 2)  
eTable 8. MRD, transplant rates and events according to risk groups  
eTable 9. Baseline characteristics for randomized patients by age group  
eFigure. Survival plots for subgroups  
eTable 10. Baseline characteristics for early treatment failure patients

This supplemental material has been provided by the authors to give readers additional information about their work.

## Supplemental eTable 1. Reinduction treatment

### Block 1 (Weeks 1-4)

| Drug                                                                       | Dose                                   | Route    | Days                     |
|----------------------------------------------------------------------------|----------------------------------------|----------|--------------------------|
| Mitoxantrone                                                               | 10 mg/m <sup>2</sup> /dose             | IV       | 1, 2                     |
| Dexamethasone                                                              | 10 mg/m <sup>2</sup> /dose twice daily | PO or IV | 1 - 5, 15 - 19           |
| Vincristine                                                                | 1.5 mg/m <sup>2</sup> /dose (max 2mg)  | IV       | 1, 8, 15, 22             |
| Pegaspargase <sup>a</sup>                                                  | 2500 IU/m <sup>2</sup> /dose           | IV       | 3, 17                    |
| Methotrexate for all patients                                              | Age-based                              | IT       | 1                        |
| Methotrexate for CNS1 <sup>b</sup> ONLY                                    | Age-based                              | IT       | 8                        |
| Methotrexate for CNS2 <sup>b</sup> ONLY                                    | Age-based                              | IT       | 8, (15, 22) <sup>d</sup> |
| Triple IT <sup>c</sup> for CNS3 <sup>b</sup> and isolated CNS relapse ONLY | Age-based                              | IT       | 8, 15, 22                |

<sup>a</sup> For hypersensitivity, 6 injections of asparaginase *Erwinia chrysanthemi* may be substituted for each dose of pegaspargase

<sup>b</sup> CNS1: CSF WBC < 5 per microliter, no blasts on cytospin; CNS2: CSF WBC < 5 per microliter, blasts present on cytospin; CNS3: CSF WBC ≥ 5 per microliter, blasts present on cytospin, or clinical/radiographic signs of central nervous leukemia

<sup>c</sup> Triple Intrathecal therapy (Triple IT): methotrexate, hydrocortisone, and cytarabine

<sup>d</sup> Methotrexate dose for Days 15 and 22 only for CNS2 subjects who do not have clear CSF samples in weeks 1 & 2.

**Supplemental eTable 2. Randomized treatment, blinatumomab group****Blinatumomab Cycle 1 (5 weeks)**

| <b>Drug</b>                                                   | <b>Dose</b>                           | <b>Route</b>                   | <b>Days</b>                            |
|---------------------------------------------------------------|---------------------------------------|--------------------------------|----------------------------------------|
| Blinatumomab                                                  | 15 micrograms/m <sup>2</sup> /day     | IV, 28 day Continuous Infusion | 1 - 28, followed by 1 week rest period |
| Dexamethasone                                                 | 5 mg/m <sup>2</sup> /dose (max 20 mg) | PO or IV                       | 1 <sup>a</sup>                         |
| Methotrexate for CNS1/2 ONLY                                  | Age-based                             | IT                             | 15, 29                                 |
| Triple IT for CNS3 and isolated CNS relapse ONLY <sup>b</sup> | Age-based                             | IT                             | 15, 29                                 |

<sup>a</sup> Given 30-60 minutes prior to start of blinatumomab infusion

<sup>b</sup> Triple Intrathecal therapy (Triple IT) is made up of methotrexate, hydrocortisone, and cytarabine

**Blinatumomab Cycle 2 (5 weeks)**

| <b>Drug</b>                                                   | <b>Dose</b>                       | <b>Route</b>                   | <b>Days</b>                            |
|---------------------------------------------------------------|-----------------------------------|--------------------------------|----------------------------------------|
| Blinatumomab                                                  | 15 micrograms/m <sup>2</sup> /day | IV, 28 day Continuous Infusion | 1 - 28, followed by 1 week rest period |
| Methotrexate for CNS1/2 ONLY                                  | Age-based                         | IT                             | 8, 29                                  |
| Triple IT for CNS3 and isolated CNS relapse ONLY <sup>a</sup> | Age-based                         | IT                             | 8, 29                                  |

<sup>a</sup> Triple Intrathecal therapy (Triple IT) is made up of methotrexate, hydrocortisone, and cytarabine

**Supplemental eTable 3. Randomized treatment, chemotherapy group**

Block 2 (4 weeks)

| Drug                                                          | Dose                                     | Route            | Days    |
|---------------------------------------------------------------|------------------------------------------|------------------|---------|
| Dexamethasone                                                 | 3 mg/m <sup>2</sup> /dose twice daily    | PO or IV         | 1 - 5   |
| Vincristine                                                   | 1.5 mg/m <sup>2</sup> /dose (max 2mg)    | IV               | 1       |
| Methotrexate for CNS1/2 ONLY                                  | Age-based                                | IT               | 8       |
| Triple IT for CNS3 and isolated CNS relapse ONLY <sup>a</sup> | Age-based                                | IT               | 8, 22   |
| Methotrexate                                                  | 1000 mg/m <sup>2</sup> /dose             | IV over 36 hours | 8       |
| Leucovorin                                                    | 15 mg/m <sup>2</sup> /dose every 6 hours | IV or PO         | 10, 11  |
| Pegaspargase <sup>b</sup>                                     | 2500 IU/m <sup>2</sup> /dose             | IV               | 9 or 10 |
| Cyclophosphamide                                              | 440 mg/m <sup>2</sup> /dose              | IV               | 15 - 19 |
| Etoposide                                                     | 100 mg/m <sup>2</sup> /dose              | IV               | 15 - 19 |

<sup>a</sup> Triple Intrathecal therapy (Triple IT) is made up of methotrexate, hydrocortisone, and cytarabine

<sup>b</sup> For hypersensitivity, 6 injections of asparaginase *Erwinia chrysanthemi* may be substituted for each dose of pegaspargase

Block 3 (4 weeks)

| Drug                                                          | Dose                                        | Route            | Days            |
|---------------------------------------------------------------|---------------------------------------------|------------------|-----------------|
| Dexamethasone                                                 | 3 mg/m <sup>2</sup> /dose twice daily       | PO or IV         | 1 - 5           |
| Vincristine                                                   | 1.5 mg/m <sup>2</sup> /dose (max 2mg)       | IV               | 1               |
| Cytarabine                                                    | 1000 mg/m <sup>2</sup> /dose every 12 hours | IV over 3 hours  | 1, 2, 8, 9      |
| Asparaginase <i>Erwinia</i>                                   | 25,000 IU/m <sup>2</sup> /dose              | IM or IV         | 2, 4, 9, 11, 23 |
| Methotrexate                                                  | 1000 mg/m <sup>2</sup> /dose                | IV over 36 hours | 8               |
| Leucovorin                                                    | 15 mg/m <sup>2</sup> /dose every 6 hours    | IV or PO         | 10, 11          |
| Methotrexate for all patients                                 | Age-based                                   | IT               | 1               |
| Methotrexate for CNS1/2 ONLY                                  | Age-based                                   | IT               | 22              |
| Triple IT for CNS3 and isolated CNS relapse ONLY <sup>a</sup> | Age-based                                   | IT               | 22              |

<sup>a</sup> Triple Intrathecal therapy (Triple IT) is made up of methotrexate, hydrocortisone, and cytarabine.

**Supplemental eTable 4. Non-randomized treatment, early treatment failure group**Blinatumomab Salvage Cycle 1 (5 weeks)

| <b>Drug</b>   | <b>Dose</b>                           | <b>Route</b>            | <b>Days</b>                            |
|---------------|---------------------------------------|-------------------------|----------------------------------------|
| Blinatumomab  | 5 micrograms/m <sup>2</sup> /day      | IV, Continuous Infusion | 1 - 7                                  |
| Blinatumomab  | 15 micrograms/m <sup>2</sup> /day     | IV, Continuous Infusion | 8 – 28, followed by 1 week rest period |
| Dexamethasone | 5 mg/m <sup>2</sup> /dose (max 20 mg) | PO or IV                | 1, 8 <sup>a</sup>                      |
| Methotrexate  | Age-based                             | IT                      | 15                                     |

<sup>a</sup> Given 30-60 minutes prior to start of blinatumomab infusion (day 1) and increase in dose (day 8)

Blinatumomab Salvage Cycle 2 (5 weeks)

| <b>Drug</b>  | <b>Dose</b>                       | <b>Route</b>                   | <b>Days</b>                            |
|--------------|-----------------------------------|--------------------------------|----------------------------------------|
| Blinatumomab | 15 micrograms/m <sup>2</sup> /day | IV, 28 day Continuous Infusion | 1 - 28, followed by 1 week rest period |
| Methotrexate | Age-based                         | IT                             | 8, 29                                  |

**Supplemental eTable 5. MRD transitions**

| Transition                     | Before <sup>a</sup> | After <sup>a</sup> | All Randomized Patients<br>(n=208) |                         | P <sup>b</sup> |
|--------------------------------|---------------------|--------------------|------------------------------------|-------------------------|----------------|
|                                |                     |                    | Blinatumomab<br>(n=105)            | Chemotherapy<br>(n=103) |                |
| End reinduction to end cycle 1 | Pos                 | Neg                | 59 (76%)                           | 13 (18%)                | <0.001         |
|                                |                     | Pos                | 11 (14%)                           | 48 (68%)                |                |
|                                |                     | N.D.               | 8 (10%)                            | 10 (14%)                |                |
|                                | Neg                 | Neg                | 20 (77%)                           | 20 (65%)                | 0.31           |
|                                |                     | Pos                | 4 (15%)                            | 2 (6%)                  |                |
|                                |                     | N.D.               | 2 (8%)                             | 9 (29%)                 |                |
|                                | N.D.                | Neg                | 0                                  | 0                       | -              |
|                                |                     | Pos                | 0                                  | 0                       |                |
|                                |                     | N.D.               | 1 (100%)                           | 1 (100%)                |                |
| End reinduction to end cycle 2 | Pos                 | Neg                | 5 (33%)                            | 20 (40%)                | 0.64           |
|                                |                     | Pos                | 3 (20%)                            | 10 (20%)                |                |
|                                |                     | N.D.               | 7 (47%)                            | 20 (40%)                |                |
|                                | Neg                 | Neg                | 63 (80%)                           | 12 (36%)                | <0.001         |
|                                |                     | Pos                | 10 (13%)                           | 3 (9%)                  |                |
|                                |                     | N.D.               | 6 (8%)                             | 18 (55%)                |                |
|                                | N.D.                | Neg                | 1 (9%)                             | 1 (5%)                  | 1              |
|                                |                     | Pos                | 1 (9%)                             | 3 (15%)                 |                |
|                                |                     | N.D.               | 9 (82%)                            | 16 (80%)                |                |

<sup>a</sup> Neg: MRD < 0.01%; Pos: MRD ≥ 0.01%; or MRD < 0.1% with sensitivity 1 in 1000; N.D.: No data

<sup>b</sup> p-values are from Chi-squared tests of differences between blinatumomab and chemotherapy in the proportion of patients with MRD-negative vs. other (MRD-positive or no data)

**Supplemental eTable 6. CD19 expression for blinatumomab patients with recurrent MRD**

| Patient | MRD %           |             |             | CD19 Expression <sup>b</sup> |
|---------|-----------------|-------------|-------------|------------------------------|
|         | End Reinduction | End Cycle 1 | End Cycle 2 |                              |
| 1       | 0.3%            | <0.01%      | <0.1%*      | No data <sup>a</sup>         |
| 2       | 0.12%           | <0.01%      | 49%         | +                            |
| 3       | 0.22%           | <0.01%      | 0.054%      | +                            |
| 4       | 0.25%           | <0.01%      | 0.01%       | +                            |
| 5       | 0.024%          | <0.01%      | 0.014%      | -                            |
| 6       | 0.61%           | <0.01%      | 0.11%       | +                            |
| 7       | 0.026%          | <0.01%      | 0.035%      | -                            |
| 8       | 5.4%            | <0.01%      | 0.69%       | -                            |
| 9       | <0.01%          | <0.01%      | 0.2%        | +                            |
| 10      | 0.036%          | <0.01%      | 54.3%       | -                            |

<sup>a</sup> MRD <0.1% with sensitivity 1 in 1000 (CD19 expression data not available due to lack of events)

<sup>b</sup> +: CD19 expressed (no antigen loss); -: CD19 not expressed (antigen loss)

**Supplemental eTable 7. Adverse event summary (cumulative for cycle 1 and cycle 2)**

|                                                    | Cumulative              |                       |                        |                       |
|----------------------------------------------------|-------------------------|-----------------------|------------------------|-----------------------|
|                                                    | Blinatumomab<br>(n=102) |                       | Chemotherapy<br>(n=97) |                       |
|                                                    | Any Grade               | Grade ≥3 <sup>a</sup> | Any Grade              | Grade ≥3 <sup>a</sup> |
| <b>Patients with any Adverse Event<sup>b</sup></b> | 99 (97.1%)              | 83 (81.4%)            | 91 (93.8%)             | 90 (92.8%)            |
| <b>Anemia</b>                                      | 80 (78.4%)              | 18 (17.6%)            | 66 (68%)               | 60 (61.9%)            |
| <b>White blood cell decreased</b>                  | 75 (73.5%)              | 35 (34.3%)            | 61 (62.9%)             | 59 (60.8%)            |
| <b>Alanine aminotransferase increased</b>          | 73 (71.6%)              | 16 (15.7%)            | 65 (67%)               | 40 (41.2%)            |
| <b>Neutrophil count decreased</b>                  | 63 (61.8%)              | 48 (47.1%)            | 62 (63.9%)             | 62 (63.9%)            |
| <b>Fever</b>                                       | 58 (56.9%)              | 8 (7.8%)              | 37 (38.1%)             | 10 (10.3%)            |
| <b>Aspartate aminotransferase increased</b>        | 56 (54.9%)              | 9 (8.8%)              | 54 (55.7%)             | 16 (16.5%)            |
| <b>Hypoalbuminemia</b>                             | 52 (51%)                | 0 (0%)                | 47 (48.5%)             | 7 (7.2%)              |
| <b>Lymphocyte count decreased</b>                  | 51 (50%)                | 41 (40.2%)            | 35 (36.1%)             | 33 (34%)              |
| <b>Platelet count decreased</b>                    | 45 (44.1%)              | 10 (9.8%)             | 68 (70.1%)             | 65 (67%)              |
| <b>Hyperglycemia</b>                               | 44 (43.1%)              | 3 (2.9%)              | 31 (32%)               | 14 (14.4%)            |
| <b>Hypokalemia</b>                                 | 38 (37.3%)              | 7 (6.9%)              | 50 (51.5%)             | 24 (24.7%)            |
| <b>Hypocalcemia</b>                                | 34 (33.3%)              | 2 (2%)                | 41 (42.3%)             | 6 (6.2%)              |
| <b>Infection<sup>c,d</sup></b>                     | 28 (27%)                | 15 (15%)              | 68 (70%)               | 63 (65%)              |
| <b>Vomiting</b>                                    | 24 (23.5%)              | 1 (1%)                | 27 (27.8%)             | 6 (6.2%)              |
| <b>Hypophosphatemia</b>                            | 22 (21.6%)              | 0 (0%)                | 21 (21.6%)             | 7 (7.2%)              |
| <b>Hypotension</b>                                 | 20 (19.6%)              | 4 (3.9%)              | 17 (17.5%)             | 11 (11.3%)            |
| <b>Blood bilirubin increased</b>                   | 18 (17.6%)              | 2 (2%)                | 38 (39.2%)             | 8 (8.2%)              |
| <b>Anorexia</b>                                    | 14 (13.7%)              | 4 (3.9%)              | 19 (19.6%)             | 14 (14.4%)            |
| <b>GGT increased</b>                               | 12 (11.8%)              | 5 (4.9%)              | 10 (10.3%)             | 6 (6.2%)              |
| <b>Febrile neutropenia<sup>c</sup></b>             | 6 (5.9%)                | 5 (4.9%)              | 56 (57.7%)             | 56 (57.7%)            |
| <b>Mucositis oral<sup>c</sup></b>                  | 5 (4.9%)                | 1 (1%)                | 50 (51.5%)             | 27 (27.8%)            |
| <b>Sepsis<sup>c</sup></b>                          | 2 (2%)                  | 2 (2%)                | 26 (26.8%)             | 26 (26.8%)            |
| <b>Typhlitis</b>                                   | 0 (0%)                  | 0 (0%)                | 5 (5.2%)               | 5 (5.2%)              |

| <b>Blinatumomab-Related Adverse Event</b>    |          |        |     |     |
|----------------------------------------------|----------|--------|-----|-----|
| <b>Cytokine Release Syndrome<sup>e</sup></b> | 22 (22%) | 1 (1%) | n/a | n/a |
| <b>Encephalopathy</b>                        | 15 (15%) | 4 (4%) | n/a | n/a |
| <b>Seizure</b>                               | 5 (5%)   | 1 (1%) | n/a | n/a |

<sup>a</sup> Grading was performed according to NCI Common Terminology Criteria for Adverse Events version 4.0. Criteria range from 1 to 5 with 3 being severe or medically significant but not immediately life-threatening, 4 being life-threatening and indicating urgent intervention, and 5 being death. Criteria are assigned by the treating physician and certain serious adverse events as defined in the protocol are reported as per federal guidelines.

<sup>b</sup> This table includes only adverse events that occurred with a grade of 3 or greater at a frequency of 5% or greater in at least one cycle for either group.

<sup>c</sup> These four adverse events of special interest were identified based on their known association with life-threatening complications.

<sup>d</sup> "Infection" includes catheter-related, lung, skin, upper respiratory, and urinary tract infections.

<sup>e</sup> Cytokine Release Syndrome is a toxicity caused by rapid release of cytokines into the blood known to occur with immunotherapies including blinatumomab. Signs and symptoms of cytokine release syndrome include fever, nausea, headache, rash, tachycardia, hypotension, and tachypnea



**Supplemental eTable 8: MRD, transplant rates and events according to risk groups**

| Time Point                                                   | Minimal Residual Disease <sup>a</sup> | High Risk: Bone Marrow (n=118) |                     |                | Intermediate Risk: Bone Marrow (n=70) |                     |                | High Risk: Isolated Extramedullary (n=20) |                     |                |
|--------------------------------------------------------------|---------------------------------------|--------------------------------|---------------------|----------------|---------------------------------------|---------------------|----------------|-------------------------------------------|---------------------|----------------|
|                                                              |                                       | Blinatumomab (n=59)            | Chemotherapy (n=59) | P <sup>b</sup> | Blinatumomab (n=36)                   | Chemotherapy (n=34) | P <sup>b</sup> | Blinatumomab (n=10)                       | Chemotherapy (n=10) | P <sup>b</sup> |
| End Reinduction                                              | Negative                              | 17 (29%)                       | 22 (37%)            | 0.33           | 0                                     | 0                   | -              | 9 (90%)                                   | 9 (90%)             | 1              |
|                                                              | Positive                              | 41 (69%)                       | 36 (61%)            |                | 36 (100%)                             | 34 (100%)           |                | 1 (10%)                                   | 1 (10%)             |                |
|                                                              | No data <sup>e</sup>                  | 1 (2%)                         | 1 (2%)              |                | 0                                     | 0                   |                | 0                                         | 0                   |                |
| End Cycle 1                                                  | Negative                              | 37 (63%)                       | 23 (39%)            | 0.01           | 33 (92%)                              | 4 (12%)             | <0.001         | 9 (90%)                                   | 6 (60%)             | 0.30           |
|                                                              | Positive                              | 14 (24%)                       | 22 (37%)            |                | 1 (3%)                                | 27 (79%)            |                | 0                                         | 1 (10%)             |                |
|                                                              | No data <sup>e</sup>                  | 8 (14%)                        | 14 (24%)            |                | 2 (6%)                                | 3 (9%)              |                | 1 (10%)                                   | 3 (30%)             |                |
| End Cycle 2                                                  | Negative                              | 29 (49%)                       | 11 (19%)            | <0.001         | 33 (92%)                              | 17 (50%)            | <0.001         | 7 (70%)                                   | 5 (50%)             | 0.65           |
|                                                              | Positive                              | 14 (24%)                       | 12 (20%)            |                | 0                                     | 3 (9%)              |                | 0                                         | 1 (10%)             |                |
|                                                              | No data <sup>e</sup>                  | 16 (27%)                       | 36 (61%)            |                | 3 (8%)                                | 14 (41%)            |                | 3 (30%)                                   | 4 (40%)             |                |
| <b>Hematopoietic stem cell transplant status<sup>c</sup></b> |                                       |                                |                     |                |                                       |                     |                |                                           |                     |                |
|                                                              | Transplant                            | 35 (59%)                       | 19 (32%)            | 0.003          | 32 (89%)                              | 19 (56%)            | .003           | 7 (70%)                                   | 6 (60%)             | 1              |
|                                                              | No transplant                         | 24 (41%)                       | 40 (68%)            |                | 4 (11%)                               | 15 (44%)            |                | 3 (30%)                                   | 4 (40%)             |                |
| <b>First Event Type</b>                                      |                                       |                                |                     |                |                                       |                     |                |                                           |                     |                |
|                                                              | Late treatment failure <sup>d</sup>   | 1 (3%)                         | 4 (10%)             |                | 0                                     | 5 (45%)             |                | 0                                         | 0                   |                |
|                                                              | Relapse                               | 28 (78%)                       | 23 (58%)            |                | 4 (50%)                               | 3 (27%)             |                | 3 (75%)                                   | 6 (75%)             |                |
|                                                              | Death                                 | 7 (19%)                        | 13 (33%)            |                | 4 (50%)                               | 3 (27%)             |                | 1 (25%)                                   | 2 (25%)             |                |
|                                                              | Total number of events                | 36                             | 40                  |                | 8                                     | 11                  |                | 4                                         | 8                   |                |

<sup>a</sup> Negative: MRD < 0.01%; Positive: MRD ≥ 0.01%; or MRD < 0.1% with sensitivity 1 in 1000

<sup>b</sup> p-values evaluating the association between MRD response and treatment groups, or between transplant and treatment groups, are based on Pearson's Chi-squared tests.

<sup>c</sup> Transplant: received transplant without intervening non-protocol therapy; No transplant: did not receive transplant, or received non-protocol therapy prior to transplant

<sup>d</sup> Late treatment failure: ≥5% blasts in marrow after cycle 1

<sup>e</sup> No data: Patients who did not submit a sample at indicated time point, due to death, relapse, or removal from protocol therapy

**Supplemental eTable 9: Baseline characteristics of randomized patients by age group**

| Patient Characteristics                                                                                     | AYA: Ages 18-30 Years |                     |         | Non-AYA: Ages <18 Years |                     |         |
|-------------------------------------------------------------------------------------------------------------|-----------------------|---------------------|---------|-------------------------|---------------------|---------|
|                                                                                                             | Blinatumomab (n=15)   | Chemotherapy (n=18) | P value | Blinatumomab (n=90)     | Chemotherapy (n=85) | P value |
| <b>Age at Enrollment (years)</b><br><i>Median (1<sup>st</sup> quartile, 3<sup>rd</sup> quartile)</i>        |                       |                     | 0.90    |                         |                     | 0.70    |
| 1-9                                                                                                         |                       |                     |         | 55 (61.1%)              | 55 (64.7%)          |         |
| 10-12                                                                                                       |                       |                     |         | 10 (11.1%)              | 11 (12.9%)          |         |
| 13-17                                                                                                       |                       |                     |         | 25 (27.8%)              | 19 (22.4%)          |         |
| 18-20                                                                                                       | 8 (53.3%)             | 10 (55.6%)          |         |                         |                     |         |
| 21-30                                                                                                       | 7 (46.7%)             | 8 (44.4%)           |         |                         |                     |         |
| <b>Age at Initial Diagnosis (years)</b><br><i>Median (1<sup>st</sup> quartile, 3<sup>rd</sup> quartile)</i> |                       |                     | 0.03    |                         |                     | 0.61    |
| <1                                                                                                          |                       |                     |         | 5 (3, 10)               | 4 (2, 8)            |         |
| 1-9                                                                                                         |                       |                     |         | 7 (7.8%)                | 10 (11.8%)          |         |
| 10-12                                                                                                       | 0                     | 1 (5.6%)            |         | 56 (62.2%)              | 55 (64.6%)          |         |
| 13-17                                                                                                       | 13 (86.7%)            | 8 (44.4%)           |         | 16 (17.8%)              | 10 (11.8%)          |         |
| 18-30                                                                                                       | 2 (13.3%)             | 9 (50.0%)           |         | 11 (12.2%)              | 10 (11.8%)          |         |
| <b>Gender</b>                                                                                               |                       |                     | 0.17    |                         |                     | 0.33    |
| Female                                                                                                      | 8 (53.3%)             | 5 (27.8%)           |         | 40 (44.4%)              | 44 (51.8%)          |         |
| Male                                                                                                        | 7 (46.7%)             | 13 (72.2%)          |         | 50 (55.6%)              | 41 (48.2%)          |         |
| <b>Race (n=172)</b>                                                                                         |                       |                     | 0.63    |                         |                     | 0.14    |
| American Indian or Alaska Native                                                                            |                       |                     |         | 2 (2.7%)                | 0                   |         |
| Asian                                                                                                       |                       |                     |         | 4 (5.5%)                | 4 (5.4%)            |         |
| Black or African American                                                                                   | 1 (10.0%)             | 3 (20.0%)           |         | 6 (8.2%)                | 15 (20.3%)          |         |
| White                                                                                                       | 9 (90.0%)             | 12 (80.0%)          |         | 60 (82.2%)              | 54 (73.0%)          |         |
| Multiple Races                                                                                              |                       |                     |         | 1 (1.4%)                | 1 (1.4%)            |         |
| <b>Ethnicity (n=195)</b>                                                                                    |                       |                     | 0.41    |                         |                     | 0.96    |
| Hispanic or Latino                                                                                          | 8 (53.3%)             | 7 (38.9%)           |         | 28 (34.1%)              | 27 (33.7%)          |         |
| Not Hispanic or Latino                                                                                      | 7 (46.7%)             | 11 (61.1%)          |         | 54 (65.9%)              | 53 (66.3%)          |         |
| <b>Site of Relapse, Time from Diagnosis to Relapse, Minimal Residual Disease (MRD) after Reinduction</b>    |                       |                     | 0.03    |                         |                     | 0.65    |
| Marrow, ≥36 months                                                                                          | 10 (66.7%)            | 4 (22.2%)           |         | 26 (28.9%)              | 30 (35.3%)          |         |
| Marrow, 18-36 months                                                                                        | 4 (26.7%)             | 5 (27.8%)           |         | 37 (41.1%)              | 36 (42.4%)          |         |
| MRD≥0.1%                                                                                                    | 1                     | 3                   |         | 18                      | 16                  |         |
| MRD<0.1%                                                                                                    | 3                     | 2                   |         | 19                      | 19                  |         |
| Unknown                                                                                                     | 0                     | 0                   |         | 0                       | 1                   |         |
| Marrow, <18 months                                                                                          | 1 (6.7%)              | 7 (38.9%)           |         | 17 (18.9%)              | 11 (12.9%)          |         |
| MRD≥0.1%                                                                                                    | 0                     | 4                   |         | 8                       | 4                   |         |
| MRD<0.1%                                                                                                    | 1                     | 3                   |         | 8                       | 7                   |         |
| Unknown                                                                                                     | 0                     | 0                   |         | 1                       | 0                   |         |
| Isolated Extramedullary, <18 months                                                                         | 0                     | 2 (11.1%)           |         | 10 (11.1%)              | 8 (9.4%)            |         |
| <b>Risk Group Assignment after Reinduction</b>                                                              |                       |                     | 0.02    |                         |                     | 0.36    |
| High Risk                                                                                                   | 5 (33.3%)             | 14 (77.8%)          |         | 64 (71.1%)              | 55 (64.7%)          |         |
| Intermediate Risk                                                                                           | 10 (66.7%)            | 4 (22.2%)           |         | 26 (28.9%)              | 30 (35.3%)          |         |
| <b>Cytogenetic Group</b>                                                                                    |                       |                     | 0.39    |                         |                     | 0.48    |
| Favorable                                                                                                   | 2 (14.3%)             | 1 (6.3%)            |         | 19 (25.0%)              | 15 (20.0%)          |         |
| • ETV6-RUNX1                                                                                                | 1                     | 0                   |         | 11                      | 8                   |         |
| • Hyperdiploid with +4, +10                                                                                 | 1                     | 1                   |         | 8                       | 7                   |         |
| Unfavorable                                                                                                 | 1 (7.1%)              | 0                   |         | 6 (7.9%)                | 10 (13.3%)          |         |
| • KMT2A-rearranged                                                                                          | 1                     | 0                   |         | 6                       | 9                   |         |
| • Hypodiploid                                                                                               | 0                     | 0                   |         | 0                       | 1                   |         |

| Patient Characteristics | AYA: Ages 18-30 Years  |                        |            | Non-AYA: Ages <18 Years |                        |            |
|-------------------------|------------------------|------------------------|------------|-------------------------|------------------------|------------|
|                         | Blinatumomab<br>(n=15) | Chemotherapy<br>(n=18) | P<br>value | Blinatumomab<br>(n=90)  | Chemotherapy<br>(n=85) | P<br>value |
| Other                   | 11 (78.6%)             | 15 (93.8%)             |            | 51 (67.1%)              | 50 (66.7%)             |            |
| Unknown                 | 1                      | 2                      |            | 14                      | 10                     |            |

**Supplemental eFigure**

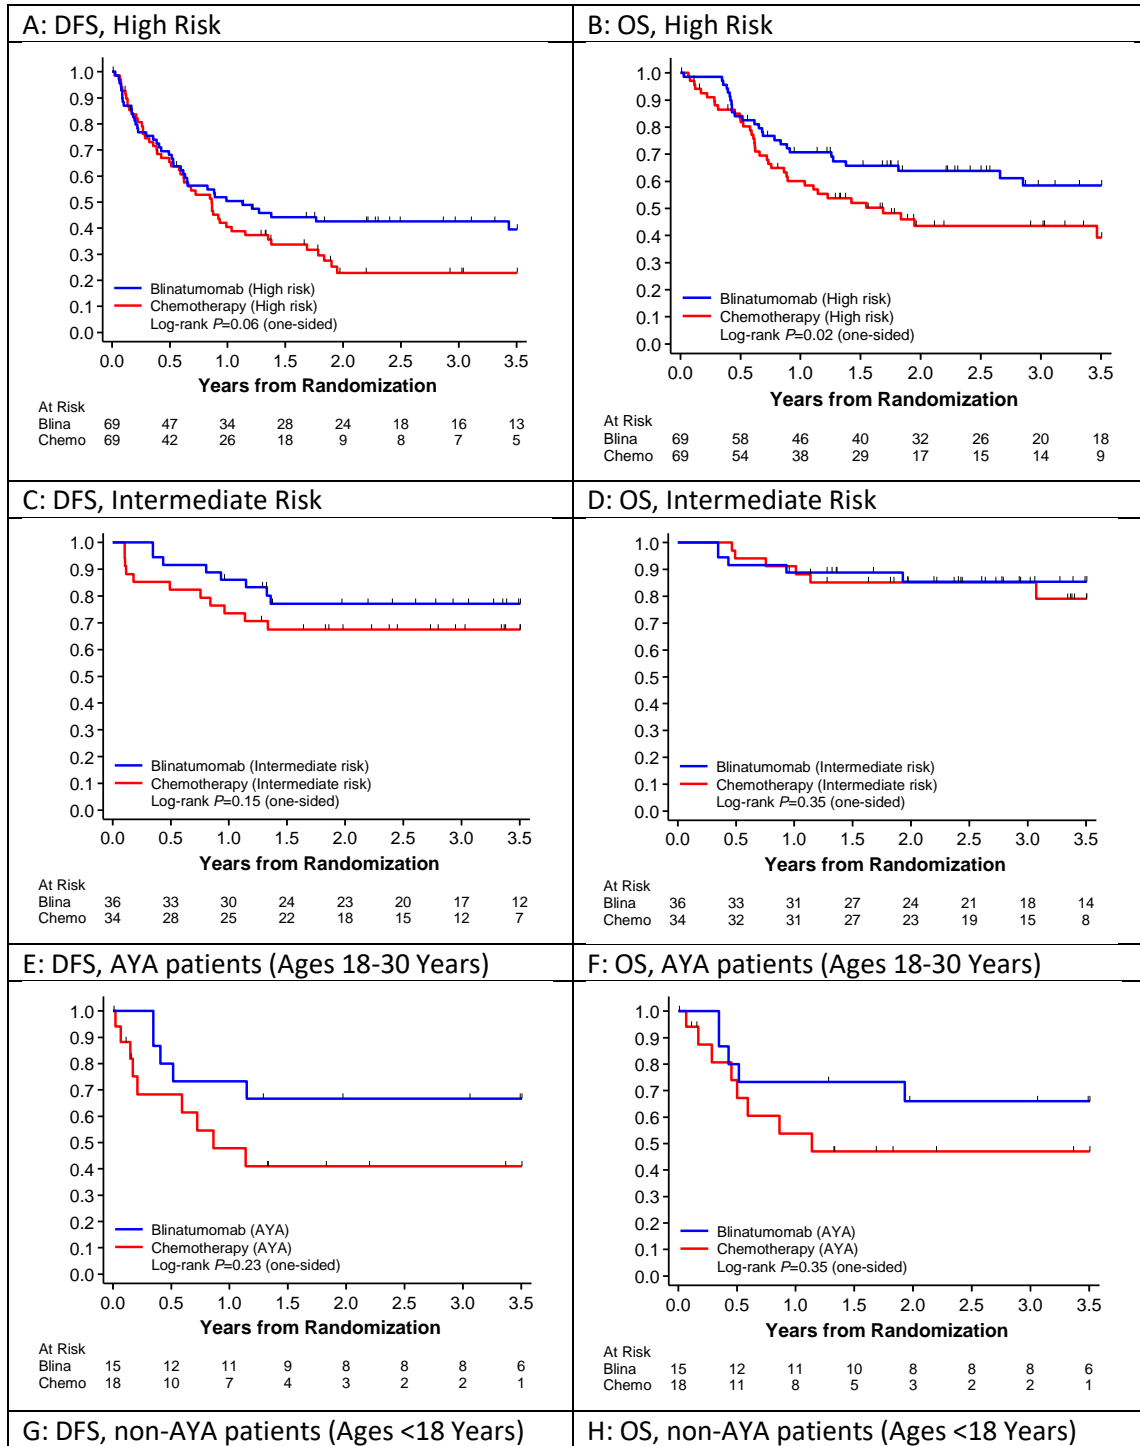

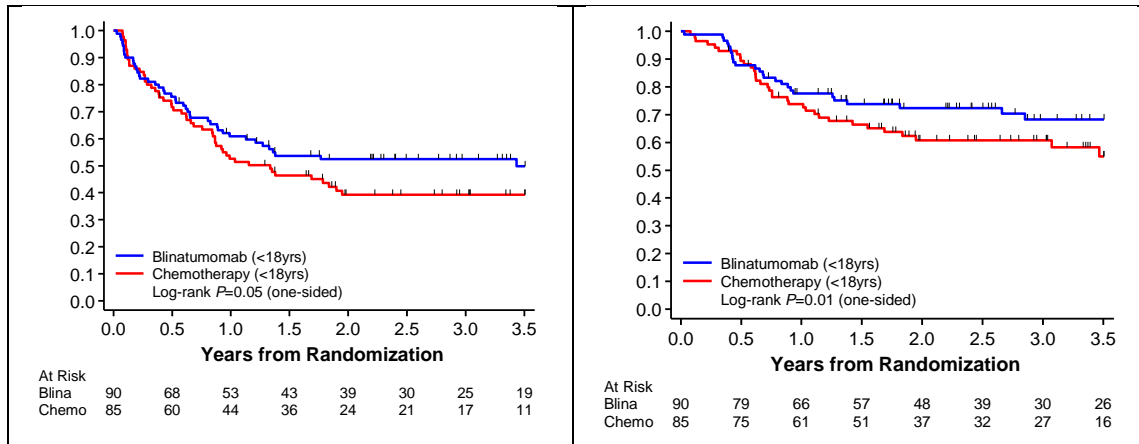

**eFigure 1. Survival plot for subgroups.** Comparison of blinatumomab group (blue solid line) vs chemotherapy group (red dashed line) for probability of disease-free survival (Panels A, C, E, G) and overall survival (Panels B, D, F, H) from time of randomization for indicated subgroups. High risk: (A) 2-year disease-free survival was 42.6% for blinatumomab vs 22.9% for chemotherapy, hazard ratio for disease progression or mortality (95% confidence interval) 0.72 (0.47, 1.1); (B) 2-year overall survival was 63.8% for blinatumomab vs 43.6% for chemotherapy, hazard ratio for mortality 0.59 (0.36, 0.98). Intermediate risk: (C) 2-year disease-free survival was 77.1% for blinatumomab vs 67.5% for chemotherapy, hazard ratio for disease progression or mortality 0.62 (0.25, 1.5); (D) 2-year overall survival was 85.5% for blinatumomab vs 85.2% for chemotherapy, hazard ratio for mortality 0.79 (0.24, 2.6). AYA (Ages 18-30 years): (E) 2-year disease-free survival was 66.7% for blinatumomab vs 41% for chemotherapy, hazard ratio for disease progression or mortality 0.62 (0.17, 2.2); (F) 2-year overall survival was 66% for blinatumomab vs 47.1% for chemotherapy, hazard ratio for mortality 0.78 (0.20, 3.0). Non-AYA (Ages <18 years): (G) 2-year disease-free survival was 52.4% for blinatumomab vs 39.2% for chemotherapy, hazard ratio for disease progression or mortality 0.70 (0.46, 1.1); (H) 2-year overall survival was 72.3% for blinatumomab vs 60.8% for chemotherapy, hazard ratio for mortality 0.54 (0.32, 0.92).

**Supplemental eTable 10: Baseline characteristics for early treatment failure patients**

| Patient Characteristics                                                                                     | All (n=45) | Not receiving salvage therapy (n=23) | Received salvage therapy (n=22) |
|-------------------------------------------------------------------------------------------------------------|------------|--------------------------------------|---------------------------------|
| <b>Age at Enrollment (years)</b><br><i>Median (1<sup>st</sup> quartile, 3<sup>rd</sup> quartile)</i>        | 12 (6, 17) | 9 (5, 15)                            | 15 (10, 19)                     |
| 1-9                                                                                                         | 18 (40.0%) | 13 (56.5%)                           | 5 (22.7%)                       |
| 10-12                                                                                                       | 5 (11.1%)  | 2 ( 8.7%)                            | 3 (13.6%)                       |
| 13-17                                                                                                       | 12 (26.7%) | 5 (21.7%)                            | 7 (31.8%)                       |
| 18-20                                                                                                       | 4 ( 8.9%)  | 1 ( 4.3%)                            | 3 (13.6%)                       |
| 21-30                                                                                                       | 6 (13.3%)  | 2 ( 8.7%)                            | 4 (18.2%)                       |
| <b>Age at Initial Diagnosis (years)</b><br><i>Median (1<sup>st</sup> quartile, 3<sup>rd</sup> quartile)</i> | 10 (5, 15) | 6 (3, 13)                            | 14 (8, 17)                      |
| <1                                                                                                          | 2 ( 4.4%)  | 1 ( 4.3%)                            | 1 ( 4.5%)                       |
| 1-9                                                                                                         | 20 (44.4%) | 15 (65.2%)                           | 5 (22.7%)                       |
| 10-12                                                                                                       | 4 ( 8.9%)  | 1 ( 4.3%)                            | 3 (13.6%)                       |
| 13-17                                                                                                       | 15 (33.3%) | 6 (26.1%)                            | 9 (40.9%)                       |
| 18-30                                                                                                       | 4 ( 8.9%)  | 0                                    | 4 (18.2%)                       |
| <b>Gender</b>                                                                                               |            |                                      |                                 |
| Female                                                                                                      | 15 (33.3%) | 6 (26.1%)                            | 9 (40.9%)                       |
| Male                                                                                                        | 30 (66.7%) | 17 (73.9%)                           | 13 (59.1%)                      |
| <b>Race<sup>a</sup></b>                                                                                     |            |                                      |                                 |
| American Indian or Alaska Native                                                                            | 0          | 0                                    | 0                               |
| Asian                                                                                                       | 1 ( 2.7%)  | 1 ( 5.0%)                            | 0                               |
| Black or African American                                                                                   | 6 (16.2%)  | 3 (15.0%)                            | 3 (17.6%)                       |
| White                                                                                                       | 29 (78.4%) | 15 (75.0%)                           | 14 (82.4%)                      |
| Multiple Races                                                                                              | 1 ( 2.7%)  | 1 ( 5.0%)                            | 0                               |
| <b>Ethnicity<sup>a</sup></b>                                                                                |            |                                      |                                 |
| Hispanic or Latino                                                                                          | 17 (38.6%) | 11 (47.8%)                           | 6 (28.6%)                       |
| Not Hispanic or Latino                                                                                      | 27 (61.4%) | 12 (52.2%)                           | 15 (71.4%)                      |
| <b>Site of Relapse, Time from Diagnosis to Relapse</b>                                                      |            |                                      |                                 |
| Marrow, ≥36 months                                                                                          | 7 (15.6%)  | 5 (21.7%)                            | 2 ( 9.1%)                       |
| Marrow, 18-36 months                                                                                        | 11 (24.4%) | 5 (21.7%)                            | 6 (27.3%)                       |
| Marrow, <18 months                                                                                          | 24 (53.3%) | 10 (43.5%)                           | 14 (63.6%)                      |
| IEM, <18 months                                                                                             | 3 ( 6.7%)  | 3 (13.0%)                            | 0                               |
| <b>Cytogenetic Group</b>                                                                                    |            |                                      |                                 |
| Favorable                                                                                                   | 7 (16.6%)  | 5 (22.7%)                            | 2 (10%)                         |
| • <i>ETV6-RUNX1</i>                                                                                         | 4 ( 9.5%)  | 2 ( 9.1%)                            | 2 (10.0%)                       |
| • Hyperdiploid with +4, +10                                                                                 | 3 ( 7.1%)  | 3 (13.6%)                            | 0                               |
| Unfavorable                                                                                                 | 7 (16.6%)  | 3 (13.6%)                            | 4 (20%)                         |
| • <i>KMT2A</i> -rearranged                                                                                  | 4 ( 9.5%)  | 2 ( 9.1%)                            | 2 (10.0%)                       |
| • Hypodiploid                                                                                               | 3 ( 7.1%)  | 1 ( 4.5%)                            | 2 (10.0%)                       |
| Other                                                                                                       | 28 (66.7%) | 14 (63.6%)                           | 14 (70.0%)                      |
| Unknown                                                                                                     | 3          | 1                                    | 2                               |

<sup>a</sup> Race was unknown for 8 patients with early treatment failure (3 without blinatumomab salvage therapy and 5 with salvage therapy), and ethnicity was unknown for 1 patient who proceeded to salvage therapy.
