# Supplementary material
Source: PubMed Central journal article supplement (PMC7926290)
Supplement: jama-e210669-s003.pdf [file jama-e210669-s003.pdf]

## Data Sharing Statement

### Data

**Data available:** Yes

**Data types:** Deidentified participant data

**How to access data:** <https://nctn-data-archive.nci.nih.gov/>

**When available:** With publication

### Supporting Documents

**Document types:** None

### Additional Information

**Who can access the data:** researchers whose proposed use of the data has been approved

**Types of analyses:** specified purpose

**Mechanisms of data availability:** see COG data sharing agreement (available upon request)
